# Supplementary material for: Crafting core–shell heterostructures of carbon nanotubes and N,O-coordinated cobalt site-impregnated conjugated porous polymers for highly efficient oxygen reduction
Source: Royal Society of Chemistry journal article supplement (doi:10.1039/d3ta02217j), 2023-01-01
Supplement: d3ta02217j1.pdf [file d3ta02217j1.pdf]

*Supporting Information*

**Crafting core-shell heterostructures of carbon nanotubes and N,O-coordinated cobalt sites-impregnated conjugated porous polymers for highly-efficient oxygen reduction**

Rui Ma,<sup>‡b</sup> Zhengjiao Xie,<sup>‡b</sup> XiaoXue Xu,<sup>a</sup> Chenglong Tang,<sup>b</sup> Xueqin Liu,<sup>a</sup> Yunhai Zhu,<sup>a</sup> Xun Cui<sup>\*a</sup> and Yingkui Yang<sup>\*a,b</sup>

<sup>a</sup> State Key Laboratory of New Textile Materials and Advanced Processing Technologies, Wuhan Textile University, Wuhan 430200, China.

<sup>b</sup> School of Chemistry and Materials Science, South-Central Minzu University, Wuhan 430074, China.

<sup>‡</sup> These two authors contributed equally to this work.

\*Corresponding authors. E-mail: [xcui@wtu.edu.cn](mailto:xcui@wtu.edu.cn); [ykyang@wtu.edu.cn](mailto:ykyang@wtu.edu.cn)

## **The Supporting Information file includes:**

### **1. Experimental Section**

- 1.1 Synthesis of Co-N,O-CPs
- 1.2 Synthesis of CNTs/N,O-CPs
- 1.3 Synthesis of CNTs/Co-N,O-CPs
- 1.4 Synthesis of CNTs/Co-N-CPs
- 1.5 Materials Characterizations
- 1.6 Electrochemical Measurements
- 1.7 Zinc-air battery Measurements
- 1.8 DFT Calculations

### **2. Figures**

**Figure S1.** (a) FTIR spectra of TP, DB, and CNTs/Co-N,O-CPs in the wave number range of 700 to 4000  $\text{cm}^{-1}$ , (b) FTIR spectrum of CNTs/Co-N,O-CPs in the wave number range of 400 to 800  $\text{cm}^{-1}$ .

**Figure S2.** FTIR spectra of TP, DB, and CNTs/N,O-CPs.

**Figure S3.** SEM image of pristine CNTs.

**Figure S4.** TEM image of pristine CNTs.

**Figure S5.** TEM images of CNTs/Co-N,O-CPs.

**Figure S6.** XRD patterns of CNTs/Co-N,O-CPs, CNTs/Co-N-CPs and pristine CNTs.

**Figure S7.** (a) HAADF-STEM image and EDX area-scan profile, (b) EDX line-scan profile of CNTs/Co-N,O-CPs.

**Figure S8.** EELS spectrum of CNTs/Co-N,O-CPs.

**Figure S9.** XPS survey spectrum of CNTs/Co-N,O-CPs.

**Figure S10.** High-resolution XPS spectra of O 1s of CNTs/Co-N,O-CPs.

**Figure S11.** Schematic illustration for the synthesis of CNTs/Co-N-CPs.

**Figure S12.** (a) FTIR spectra of TAPP, TPA and CNTs/Co-N-CPs, (b) TEM image of CNTs/Co-N-CPs.

**Figure S13.** HAADF-STEM and EDX elemental mapping images of CNTs/Co-N-CPs.

**Figure S14.** Tafel plots of CNTs/Co-N,O-CPs, CNTs/Co-N-CPs, CNTs/N,O-CPs, and Pt/C.

**Figure S15.** (a) TEM and (b) SEM images of CNTs/N,O-CPs.

**Figure S16.** HAADF image and EDX element mappings of CNTs/N,O-CPs.

**Figure S17.** (a) Nitrogen adsorption-desorption isotherms and (b) pore-size distribution of CNTs/N,O-CPs.

**Figure S18.** (a) Nitrogen adsorption-desorption isotherms and (b) pore-size distribution of CNTs/Co-N,O-CPs.

**Figure S19.** (a) Nitrogen adsorption-desorption isotherms and (b) pore-size distribution of CNTs/Co-N-CPs.

**Figure S20.** (a) SEM and (b) TEM images of Co-N,O-CPs.

**Figure S21.** HAADF-STEM and EDX element mapping images of Co-N,O-CPs.

**Figure S22.** (a) Nitrogen adsorption-desorption isotherms and (b) pore-size distribution of Co-N,O-CPs.

**Figure S23.** LSV curve of Co-N,O-CPs at a rotation speed of 1600 rpm.

**Figure S24.** (a) LSV curves, (b) K-L plots, and (c) electron transfer numbers of CNTs/Co-N,O-CPs.

**Figure S25.** (a) LSV curves, (b) K-L plots, and (c) electron transfer numbers of CNTs/Co-N-CPs.

**Figure S26.** (a) LSV curves, (b) K-L plots, and (c) electron transfer numbers of CNTs/N,O-CPs.

**Figure S27.** LSV curves of CNTs/Co-N,O-CPs before and after 5000 CV cycles.

**Figure S28.** TEM images of CNTs/Co-N,O-CPs after durability test.

**Figure S29.** HAADF-STEM and EDX elemental mapping images of CNTs/Co-N,O-CPs after durability test.

**Figure S30.** XRD pattern of CNTs/Co-N,O-CPs after durability test.

**Figure S31.** High-resolution XPS spectra of (a) Co 2p, (b) O 1s and (c) N 1s of CNTs/Co-N,O-CPs after durability test.

**Figure S32.** Chronoamperometric responses of CNTs/Co-N,O-CPs and Pt/C with the addition of methanol at approximately 100 s.

**Figure S33.** Open circuit potentials of CNTs/Co-N,O-CPs- and Pt/C-based zinc-air batteries.

**Figure S34.** Long-term durability test of CNTs/Co-N,O-CPs-based zinc-air battery recharged by replacing the zinc anode and electrolyte.

**Figure S35.** Photograph of a LED powered by two home-made zinc-air batteries with CNTs/Co-N,O-CPs as the air cathode.

**Figure S36.** Optimized geometrical structures (top and side views) of (a) \*OO, (b) \*OOH, (c) \*O, and (d) \*OH adsorbed on Co-N<sub>4</sub>.

### 3. Tables

**Table S1.** Structural parameters extracted from the EXAFS fitting of CNTs/Co-N,O-CPs.

**Table S2.** Comparison of various state-of-the-art electrocatalysts towards ORR and zinc-air batteries.

**Table S3.** BET specific surface area and pore volume of CNTs/Co-N,O-CPs and CNTs/N,O-CPs.

## **1. Experimental Section**

### **1.1 Synthesis of Co-N,O-CPs**

In a typical synthesis, 16 mg of 1,2-diaminobenzene (DB) and 21 mg of 1,3,5-triformylphloroglucinol (TP) with a molar ratio of 3:2 were mixed and stirred in 4 mL of DMF for 1 h. Subsequently, the solution obtained by dissolving 40 mg of cobalt acetate tetrahydrate ( $\text{Co}(\text{CH}_3\text{COO})_2 \cdot 4(\text{H}_2\text{O})$ ) in 1.5 mL of DMF was slowly added to the above solution under continuous stirring at room temperature. After stirring for 30 min, the above system was then transferred into a round-bottom flask and heated to 120 °C for 72 h under agitation and argon protection. Finally, the product (i.e., Co-N,O-CPs) was filtered, thoroughly washed with DMF, THF, deionized water and ethanol, and dried at 90 °C under vacuum overnight.

### **1.2 Synthesis of CNTs/N,O-CPs**

In a typical synthesis, 16 mg of DB, 21 mg of TP, and 25 mg of CNTs (hydroxyl functionalized multi-walled carbon nanotubes, TNMPH1, TimesNano, 5-15 nm in outer diameter, 10-30  $\mu\text{m}$  in length) were mixed and stirred in 5 mL of DMF to obtain a homogeneously dispersed solution. After stirring and sonication for 2 h, the above system was then transferred into a round-bottom flask and heated to 120 °C for 72 h under agitation and argon protection. Finally, the product (i.e., CNTs/N,O-CPs) was filtered, thoroughly washed with DMF, THF, deionized water and ethanol, and dried at 90 °C under vacuum overnight.

### **1.3 Synthesis of CNTs/Co-N,O-CPs**

In a typical synthesis, 16 mg of DB, 21 mg of TP, and 25 mg of CNTs were mixed and stirred in 5 mL of DMF to obtain a homogeneously dispersed solution. After stirring and sonication for 2 h, the solution obtained by dissolving 40 mg of  $\text{Co}(\text{CH}_3\text{COO})_2 \cdot 4(\text{H}_2\text{O})$  in 1.5 mL of DMF was slowly added to the above solution under continuous stirring at room temperature. After another stirring for 30 min, the above system was then transferred into a round-bottom flask and heated to 120 °C for 72 h under agitation and argon protection. Finally, the product (i.e., CNTs/Co-N,O-CPs) was filtered, thoroughly washed with DMF, THF, deionized water and ethanol, and dried at 90 °C under vacuum overnight.

#### 1.4 Synthesis of CNTs/Co-N-CPs

In a typical synthesis, 33.8 mg of Tetraaminophenyl porphyrin (TAPP), 13.6 mg of Terephthalaldehyde (TPA) and 25 mg of CNTs were mixed and stirred in 5 mL of DMAC to obtain a homogeneously dispersed solution. After stirring and sonication for 2 h and addition of 250  $\mu$ L of 6 M acetic acid solution, the above system was then transferred into a round-bottom flask and heated to 120  $^{\circ}$ C for 72 h under agitation and argon protection. The resulting CNTs/N-CPs was filtered, thoroughly washed with DMAC, THF and ethanol, and dried at 90  $^{\circ}$ C under vacuum overnight. After that, the CNTs/N-CPs and a certain amount of  $\text{Co}(\text{CH}_3\text{COO})_2 \cdot 4(\text{H}_2\text{O})$  were mixed and stirred in 10 mL of ethanol and heated to 60 $^{\circ}$ C for 24 h. Finally, the product (i.e., CNTs/Co-N-CPs) was filtered, thoroughly washed with deionized water and ethanol, and dried at 90  $^{\circ}$ C under vacuum overnight.

#### 1.5 Materials Characterizations

The morphology and structure of as-synthesized catalysts were investigated by scanning electron microscopy (SEM, Hitachi HT7700) and transmission electron microscopy (TEM, JEOL JEM-2100 F). The high-angle annular dark-field scanning transmission electron microscopy (HAADF-STEM) images were acquired by using a JEOL-2100F FETEM with electron acceleration energy of 250 kV. Fourier transfer infrared spectroscopy (FT-IR) spectra were obtained by a Thermo Nicolet NEXUS 470. The X-ray photoelectron spectroscopy (XPS) measurements were tested on a Thermo Scientific K-alpha photo-electron spectrometer (ESCALAB 250 Xi, Al K $\alpha$  radiation). The binding energies (BE) were calibrated by setting the measured BE of C 1 s to 284.8 eV. The Brunauer-Emmett-Teller (BET) specific surface area and pore-size distribution were analyzed by nitrogen adsorption-desorption experiments at 77 K based on the instrument of ASAP 2020 PLUS HD88. X-ray diffraction (XRD) patterns were recorded on a Rigaku Miniflex 600 system (Cu K $\alpha$  radiation,  $\lambda=1.5418$   $\text{\AA}$ ). XAFS spectra at the Co K-edge was collected at BL 14W1 station at Shanghai Synchrotron Radiation Facility (SSRF).

#### 1.6 Electrochemical Measurements

The electrochemical measurements were conducted on the CHI 760E electrochemical workstation at room temperature. The glassy carbon rotating disk electrode (5.0 mm of diameter, 0.196 cm<sup>2</sup>) coated with catalyst film was used as working electrode with Ag/AgCl (saturated KCl) and graphite rod as the reference and counter electrodes, respectively. All the potential was converted to the reversible hydrogen electrode (RHE) according to the Nernst equation ( $E_{\text{RHE}} = E_{(\text{Ag}/\text{AgCl})} + 0.0591 \times \text{pH} + 0.197$ ) in this work. The catalyst ink was prepared by mixing 5 mg of catalyst powder, 650  $\mu\text{L}$  of deionized water, 300  $\mu\text{L}$  of ethanol, and 50  $\mu\text{L}$  of Nafion solution (5 wt%) and sonicating for 2 h. The cyclic voltammetry (CV) measurements were performed with a sweep rate of 20 mV s<sup>-1</sup> in N<sub>2</sub>- and O<sub>2</sub>-saturated 0.1 M KOH solution. The linear sweep voltammetry (LSV) tests were recorded at a sweep rate of 10 mV s<sup>-1</sup> with rotating speeds from 400 to 1600 rpm. The loading amounts of all catalysts including commercial Pt/C (20 wt%) were 0.20 mg cm<sup>-2</sup>. Before testing, the electrolyte was saturated with N<sub>2</sub> or O<sub>2</sub> for at least 30 min. The long-term durability tests and methanol resistance were evaluated by chronoamperometry in O<sub>2</sub>-saturated electrolyte with a rotation speed of 1600 rpm at the half-wave potential. The rotating ring disk electrode (RRDE) was used to assess the peroxide (H<sub>2</sub>O<sub>2</sub>) yield and electron transfer number (n) based on the below equations:

$$\text{H}_2\text{O}_2\% = 200 \frac{I_r/N}{I_d + I_r/N}$$

$$N = 4 \frac{I_d}{I_d + I_r/N}$$

Where  $I_r$ ,  $I_d$ , and  $N$  are the ring current, disk current, and collection efficiency of Pt ring ( $N=0.37$ , provided by the manufacturer), respectively. The electron transfer number (n) was also calculated by using the following Koutecky-Levich (K-L) equation:

$$\frac{1}{J} = \frac{1}{J_L} + \frac{1}{J_K} = \frac{1}{B\omega^{0.5}} + \frac{1}{J_K}$$

$$B = 0.2nFC_0(D_0)^{2/3}\nu^{-1/6}$$

where  $J$ ,  $J_L$ , and  $J_K$  are the measured current density, diffusion limited current density, and kinetic limited current density, respectively.  $\omega$  is the rotating speed (rpm),  $n$  is the electron transfer number,  $F$  is the Faraday constant (96, 485 C mol<sup>-1</sup>),  $C_0$  is the bulk

concentration of O<sub>2</sub> ( $1.2 \times 10^{-3}$  mol L<sup>-1</sup>), D<sub>0</sub> is the diffusion coefficient of O<sub>2</sub> ( $1.9 \times 10^{-5}$  cm<sup>2</sup> s<sup>-1</sup>), and  $\nu$  is the kinematic viscosity of the electrolyte (0.01 cm<sup>2</sup> s<sup>-1</sup>).

### 1.7 Zinc-air battery measurements

The zinc-air battery measurements were conducted on a home-made electrochemical liquid battery. The carbon paper coated with CNTs/Co-N,O-CPs or Pt/C (20 wt%) and polished zinc plate (purity > 99.9%, thickness: 0.5 mm) were used as the air cathode and anode, respectively. The loading amount of CNTs/Co-N,O-CPs and Pt/C on carbon paper is 1.0 mg cm<sup>-2</sup>. A mixed solution of 6.0 M KOH and 0.2 M Zn(CH<sub>3</sub>COO)<sub>2</sub> solution was used as the electrolyte. All the measurements were carried out on the home-made battery at the room temperature with an electrochemical workstation (CHI 760E).

### 1.8 DFT calculations

The first principle Density functional theory (DFT) calculations are performed by Vienna Ab initio Simulation Package (VASP)<sup>[1], [2]</sup> with the projector augmented wave (PAW)<sup>[3]</sup> method. The exchange-functional is treated using the generalized gradient approximation (GGA) of Perdew-Burke-Ernzerhof (PBE) functional.<sup>[4]</sup> The energy cutoff for the plane wave basis expansion was set to 400 eV and the force on each atom less than 0.02 eV/Å was set for convergence criterion of geometry relaxation. To simulate the metal-nitrogen-doped carbon materials, a 6 × 6 graphene supercell was employed with ~15 Å vacuum space added in z-direction to avoid the periodical interactions. The Brillouin zone integration is performed using 3 × 3 × 1 gamma-centered k-point sampling through all the computational process. The self-consistent calculations apply a convergence energy threshold of 10<sup>-5</sup> eV. The free energy diagrams for ORR were calculated with reference to the computational hydrogen electrode (CHE).<sup>[5]</sup> The CHE model uses one half of the chemical potential of gaseous hydrogen ( $\mu(\text{H}_2)$ ) as the chemical potential of the proton-electron pair ( $\mu(\text{H}^+/\text{e}^-)$ ). The free energy of each species can be obtained from the equation:

$$\Delta G = \Delta E_{\text{DFT}} + \Delta E_{\text{ZPE}} - T\Delta S$$

Where the  $\Delta E_{\text{DFT}}$  is the reaction energy from DFT calculations, and the  $\Delta E_{\text{ZPE}}$  and  $T\Delta S$  are the change in the zero-point energy and entropy at room temperature ( $T=298.15$  K), which are obtained after frequency calculations.

The ORR reaction proceeds with a  $4e^-$  pathway are shown as follows:

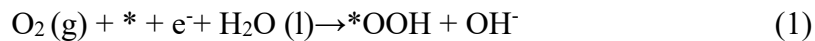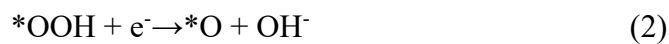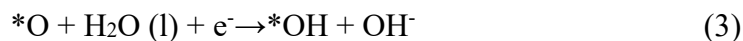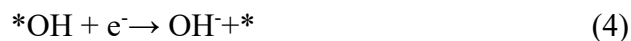

Where  $*$  refers to an active site on the catalysts surface.

## References

- [1] G. Kresse and J. Furthmüller, *Phys. Rev. B*, 1996, **54**, 11169-11186.
- [2] G. Kresse and J. Furthmüller, *Comput. Mater. Sci.*, 1996, **6**, 15-50.
- [3] G. Kresse and D. Joubert, *Phys. Rev. B*, 1999, **59**, 1758-1775.
- [4] J. P. Perdew, K. Burke and M. Ernzerhof, *Phys. Rev. Lett.*, 1996, **77**, 3865-3868.
- [5] J. K. Nørskov, J. Rossmeisl, A. Logadottir, L. Lindqvist, J. R. Kitchin, T. Bligaard and H. Jonsson, *J. Phys. Chem. B*, 2004, **108**, 17886-17892.



## 2. Figures

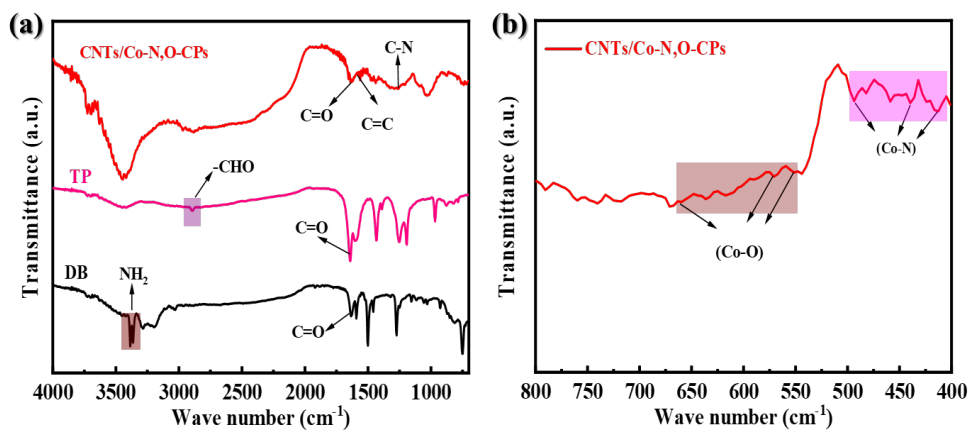

**Figure S1.** (a) FTIR spectra of TP, DB, and CNTs/Co-N,O-CPs in the wave number range of 700 to 4000  $\text{cm}^{-1}$ , (b) FTIR spectrum of CNTs/Co-N,O-CPs in the wave number range of 400 to 800  $\text{cm}^{-1}$ .

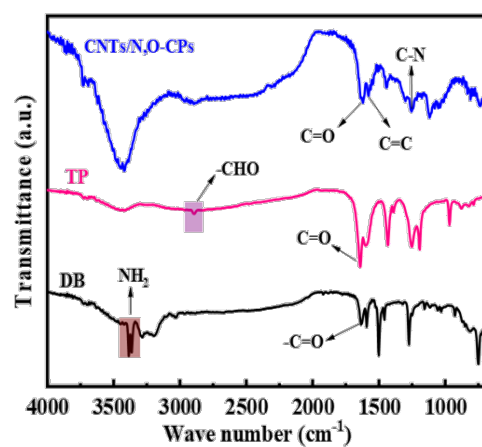

**Figure S2.** FTIR spectra of TP, DB, and CNTs/N,O-CPs.

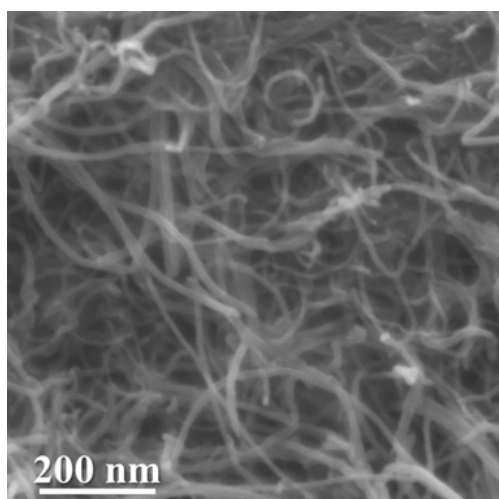

**Figure S3.** SEM image of the pristine CNTs.

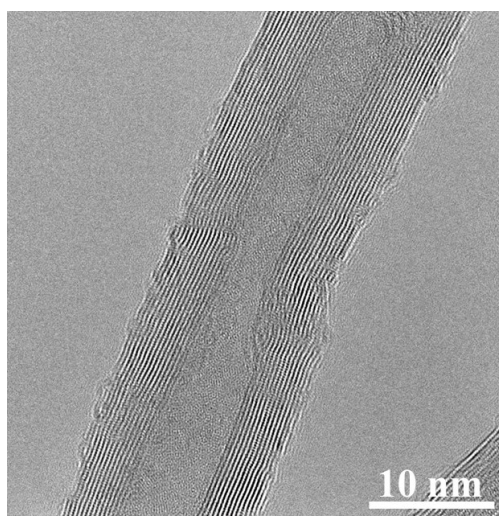

**Figure S4.** TEM image of pristine CNTs.

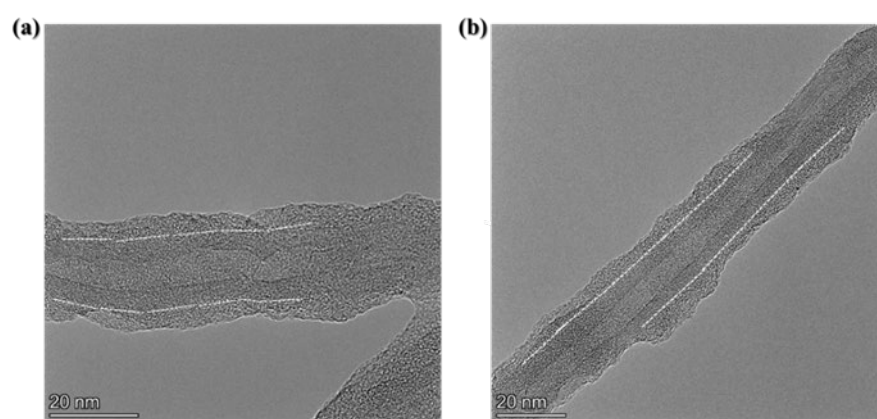

**Figure S5.** TEM images of CNTs/Co-N,O-CPs.

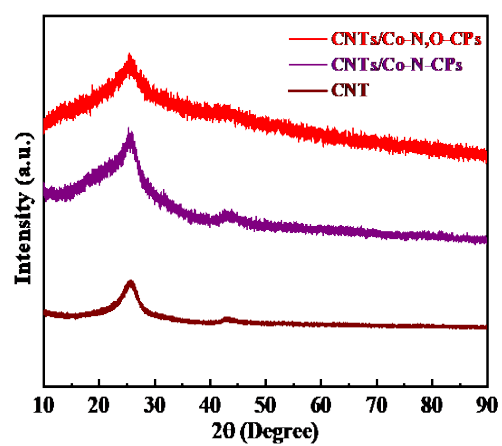

**Figure S6.** XRD patterns of CNTs/Co-N,O-CPs, CNTs/Co-N-CPs, and pristine CNTs.

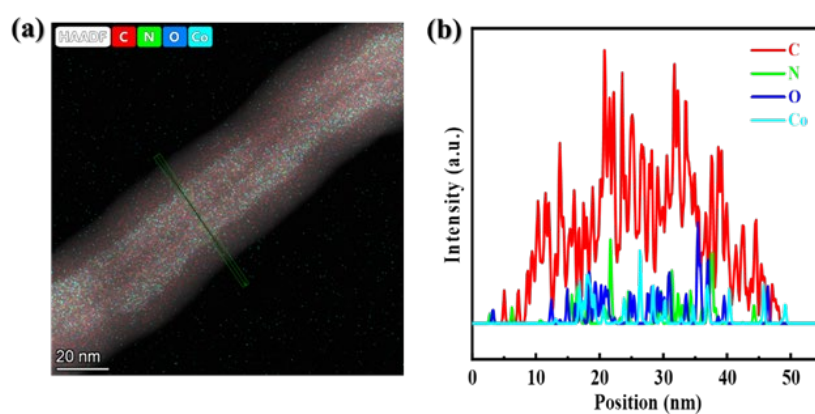

**Figure S7.** (a) HAADF-STEM image and EDX area-scan profile, (b) EDX line-scan profile of CNTs/Co-N,O-CPs.

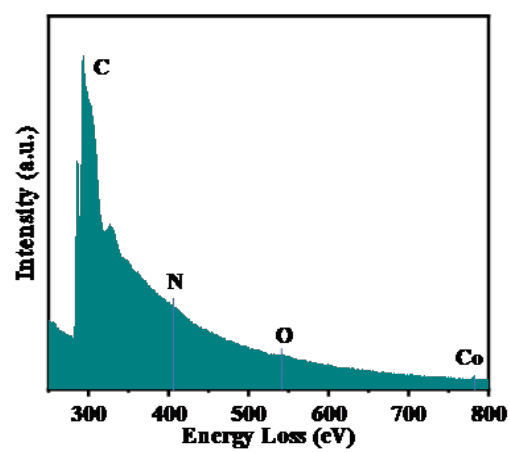

**Figure S8.** EELS spectrum of CNTs/Co-N<sub>2</sub>O-CPs.



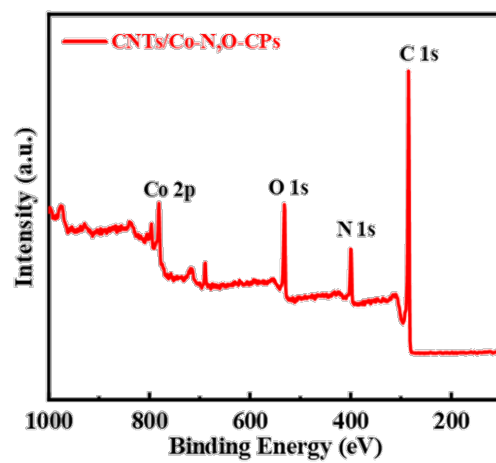

**Figure S9.** XPS survey spectrum of CNTs/Co-N,O-CPs.

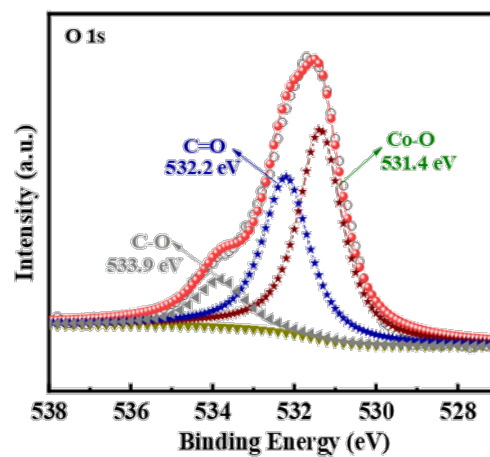

**Figure S10.** High-resolution XPS spectrum of O 1s of CNTs/Co-N,O-CPs.

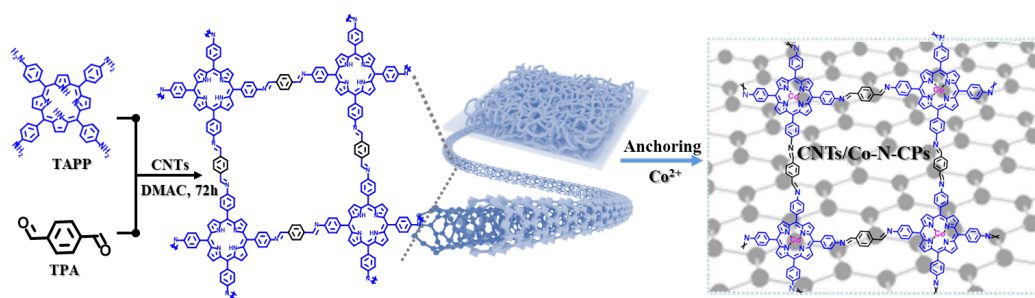

**Figure S11.** Schematic illustration for the synthesis of CNTs/Co-N-CPs.

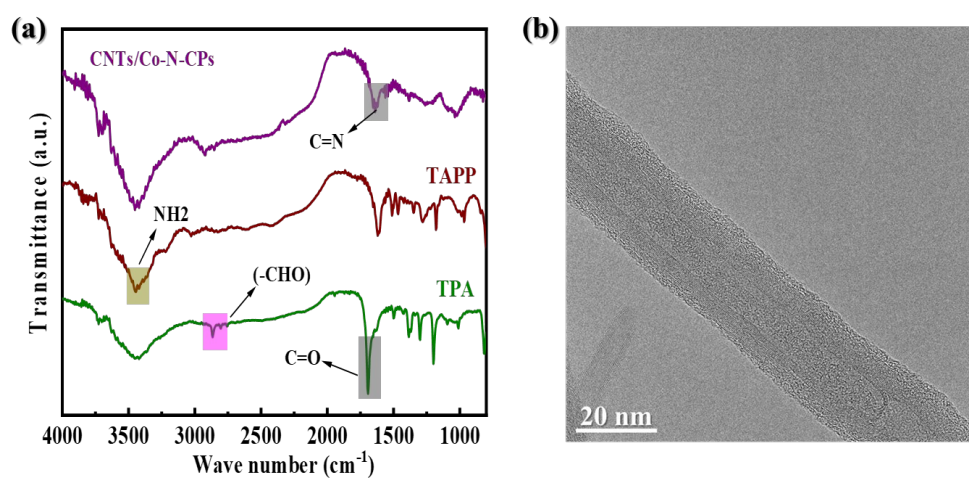

**Figure S12.** (a) FTIR spectra of TAPP, TPA and CNTs/Co-N-CPs, (b) TEM image of CNTs/Co-N-CPs.

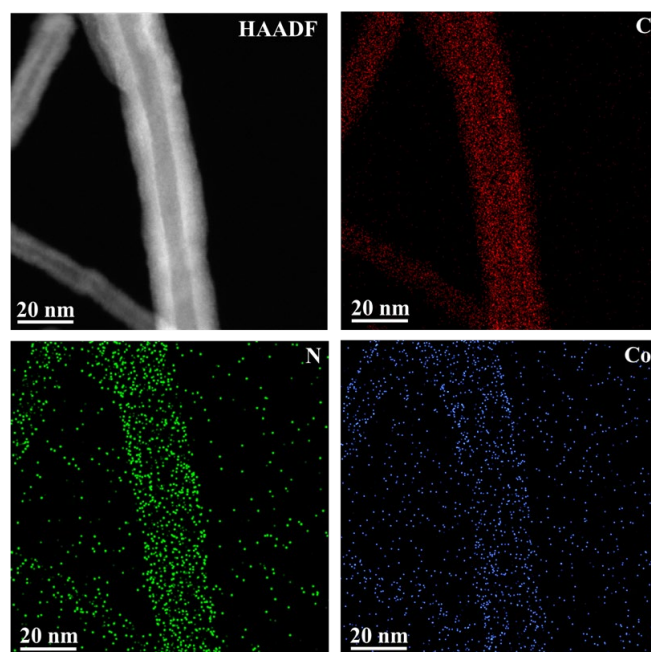

**Figure S13.** HAADF-STEM and EDX elemental mapping images of CNTs/Co-N-CPs.

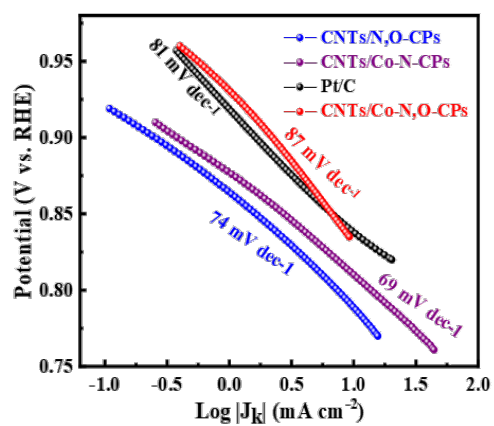

**Figure S14.** Tafel plots of CNTs/Co-N,O-CPs, CNTs/Co-N-CPs, CNTs/N,O-CPs, and Pt/C.

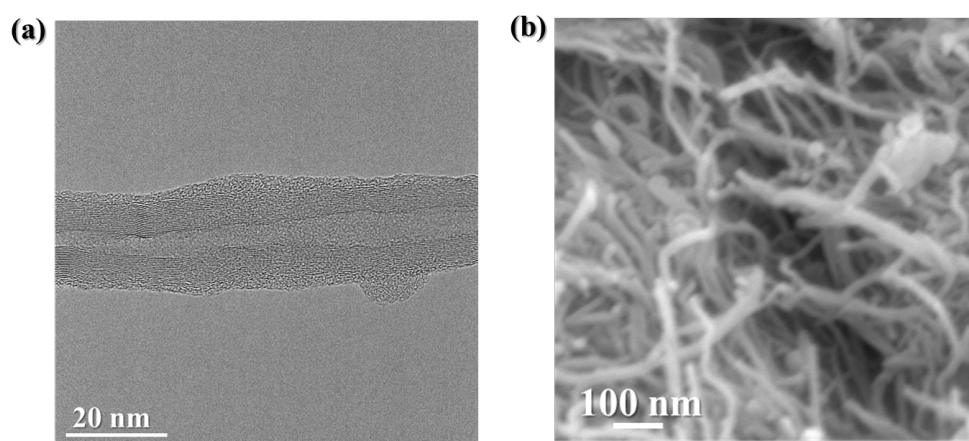

**Figure S15.** (a) TEM and (b) SEM images of CNTs/N,O-CPs.

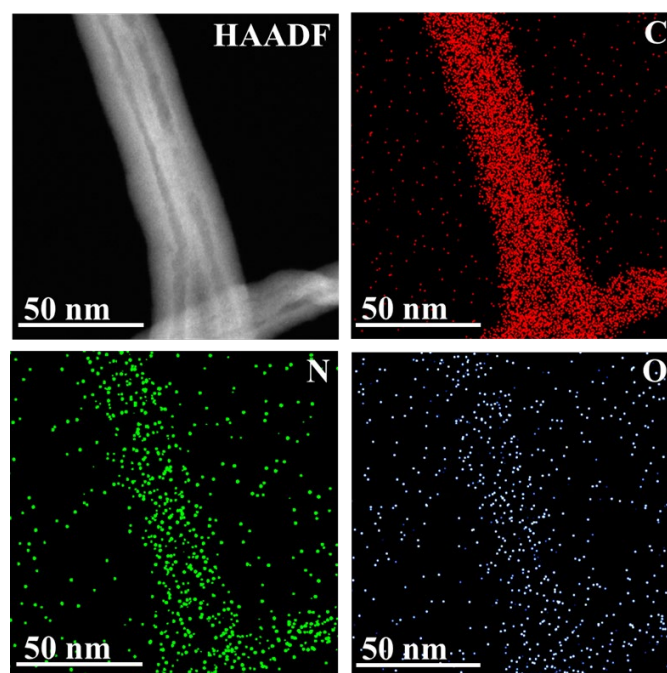

**Figure S16.** HAADF-STEM and EDX elemental mapping images of CNTs/N,O-CPs.



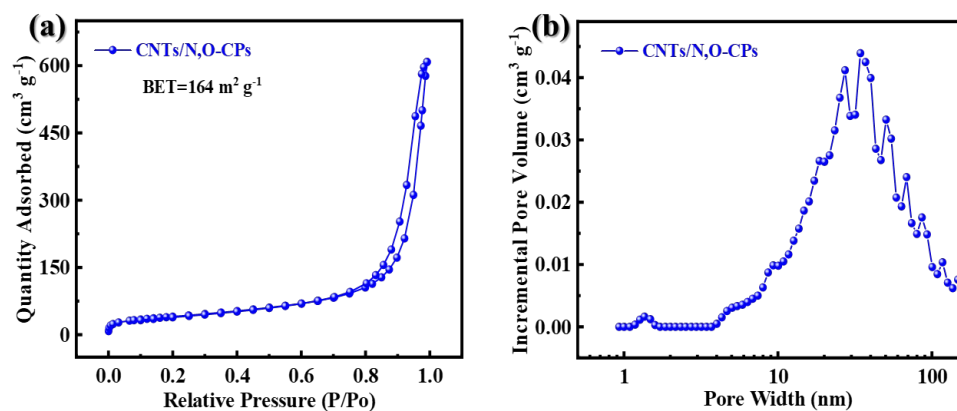

**Figure S17.** (a) Nitrogen adsorption-desorption isotherms and (b) pore-size distribution of CNTs/N,O-CPs.

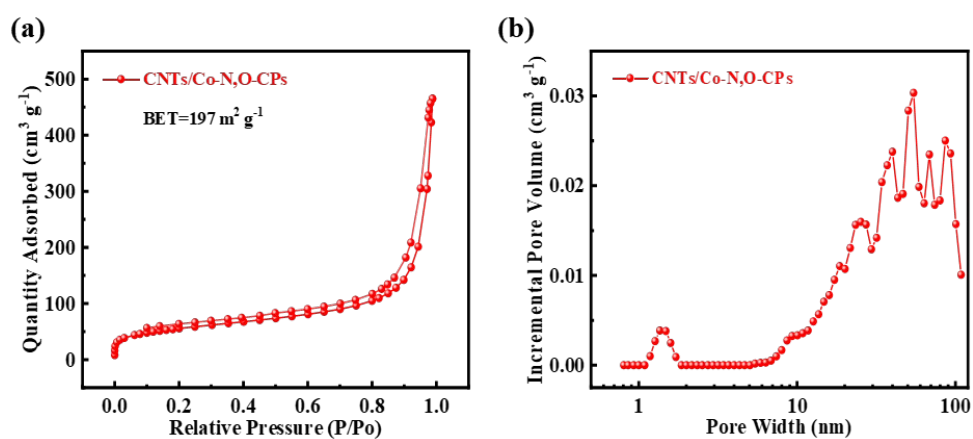

**Figure S18.** (a) Nitrogen adsorption-desorption isotherms and (b) pore-size distribution of CNTs/Co-N,O-CPs.

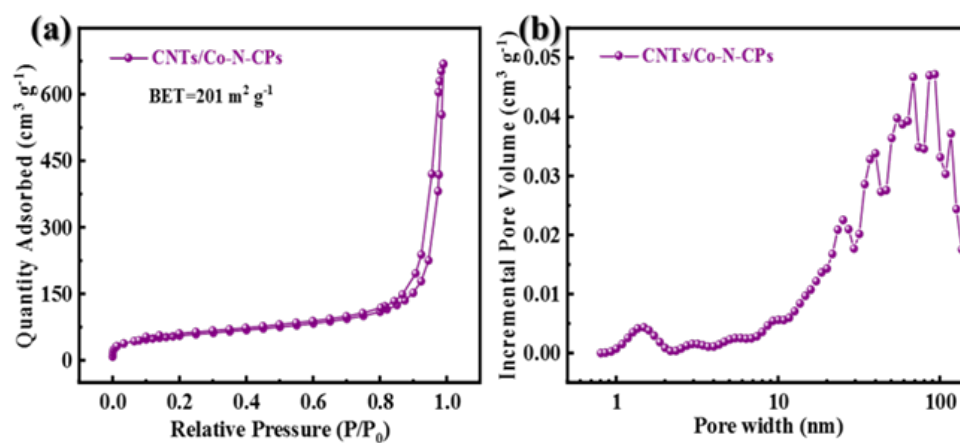

**Figure S19.** (a) Nitrogen adsorption-desorption isotherms and (b) pore-size distribution of CNTs/Co-N-CPs.

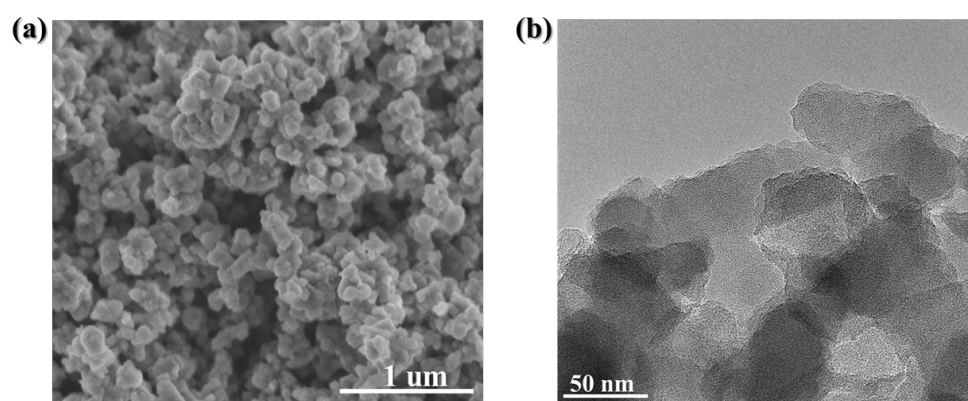

**Figure S20.** (a) SEM and (b) TEM images of Co-N,O-CPs.

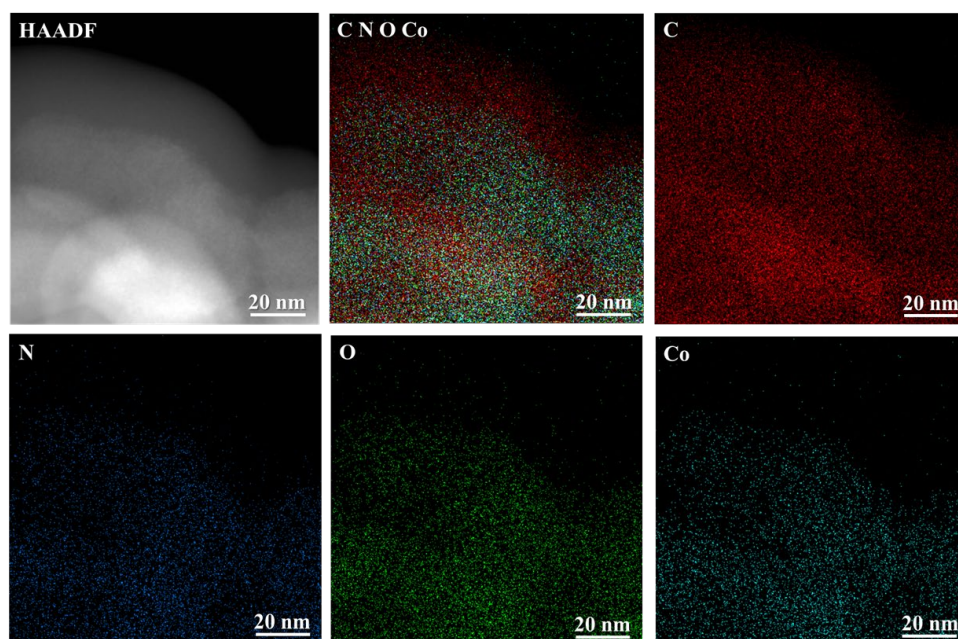

**Figure S21.** HAADF-STEM and EDX element mapping images of Co-N,O-CPs.

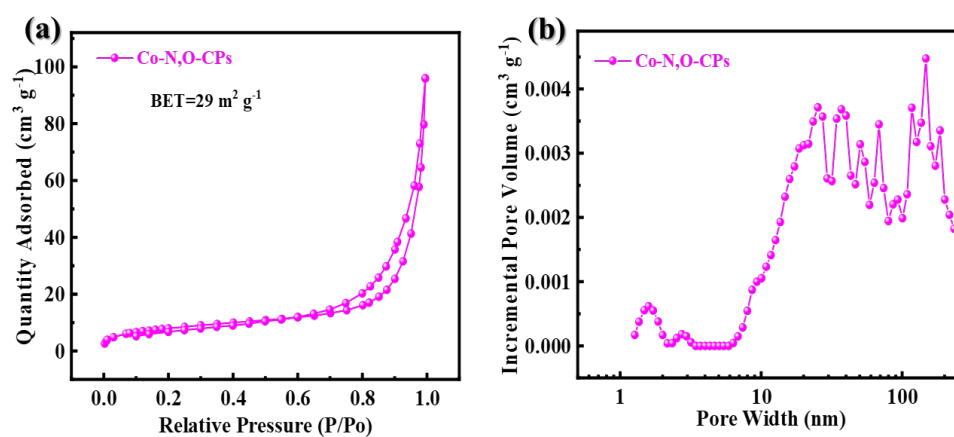

**Figure S22.** (a) Nitrogen adsorption-desorption isotherms and (b) pore-size distribution of Co-N,O-CPs.

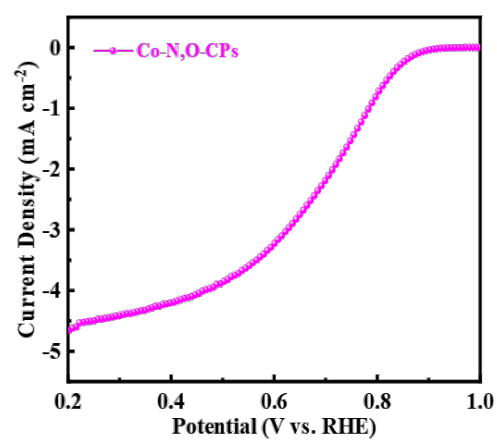

**Figure S23.** LSV curve of Co-N,O-CPs at a rotation speed of 1600 rpm.

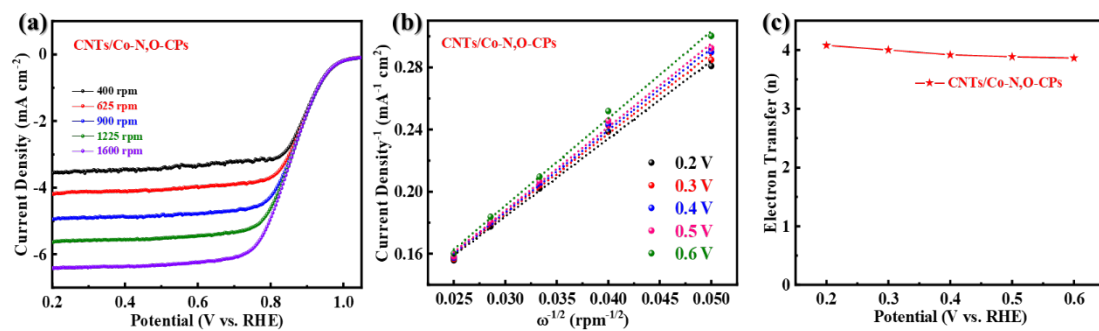

**Figure S24.** (a) LSV curves, (b) K-L plots, and (c) electron transfer numbers of CNTs/Co-N,O-CPs.



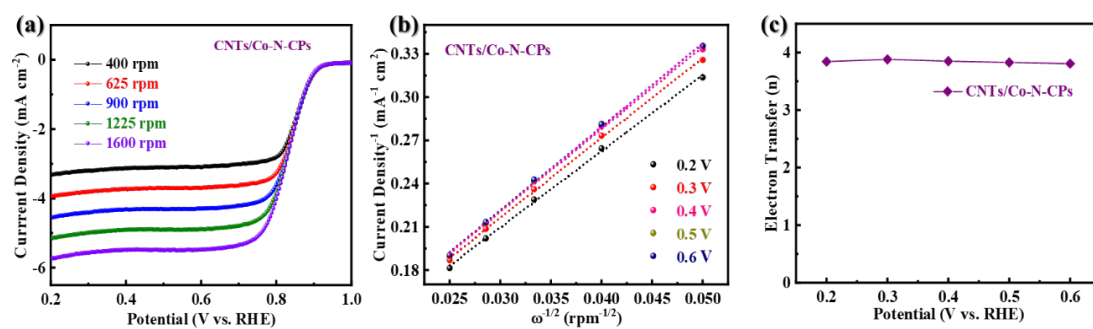

**Figure S25.** (a) LSV curves, (b) K-L plots, and (c) electron transfer numbers of CNTs/Co-N-CPs.

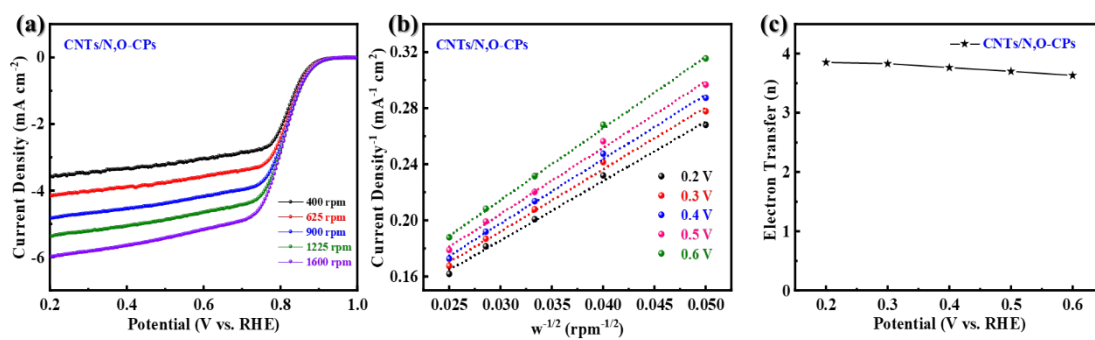

**Figure S26.** (a) LSV curves, (b) K-L plots, and (c) electron transfer numbers of CNTs/N,O-CPs.

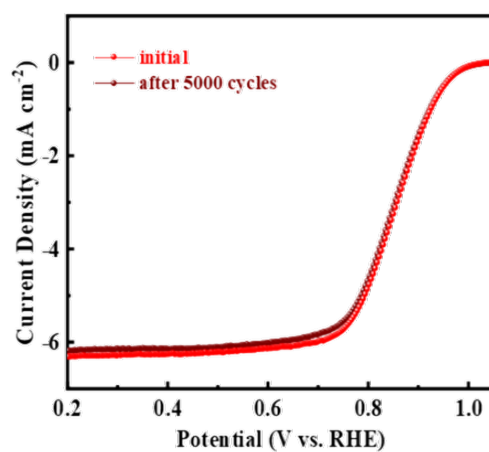

**Figure S27.** LSV curves of CNTs/Co-N<sub>2</sub>O-CPs before and after 5000 CV cycles.

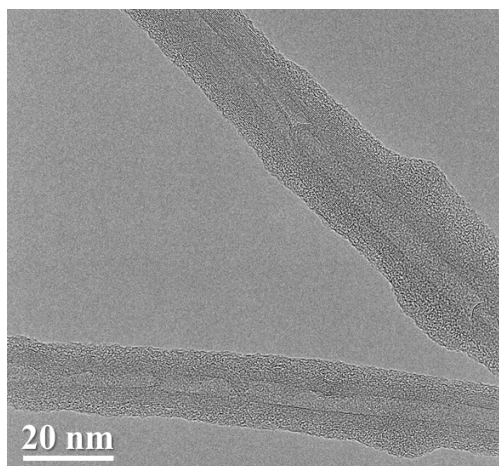

**Figure S28.** TEM image of CNTs/Co-N,O-CPs after durability test.

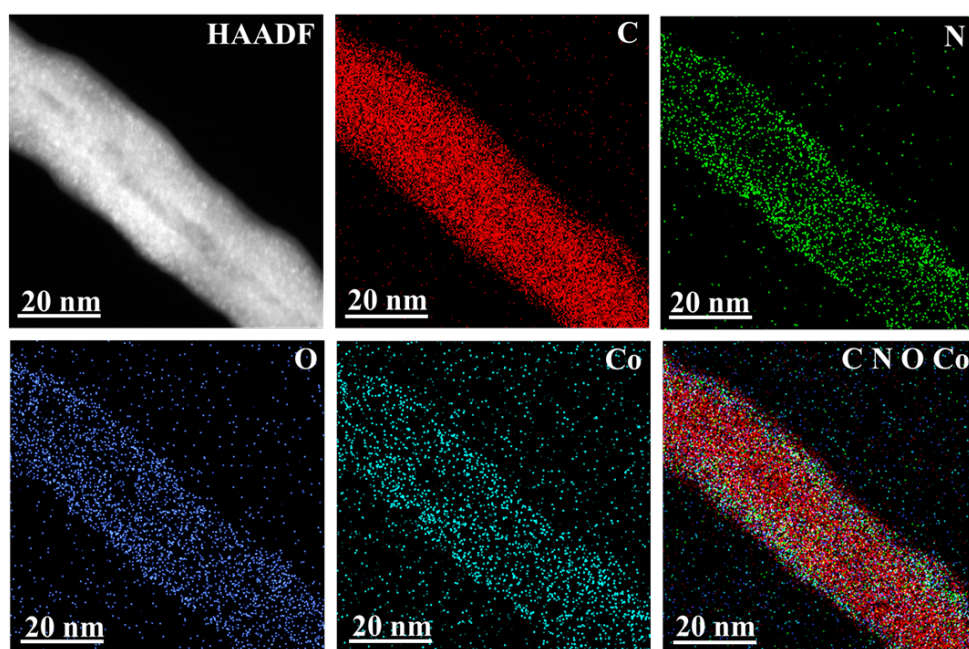

**Figure S29.** HAADF-STEM and EDX elemental mapping images of CNTs/Co-N,O-CPs after durability test.

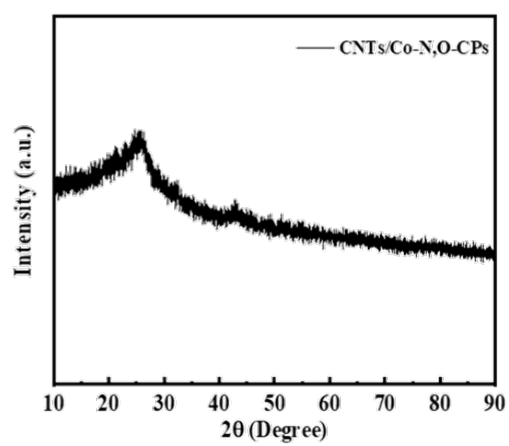

**Figure S30.** XRD pattern of CNTs/Co-N,O-CPs of after durability test.

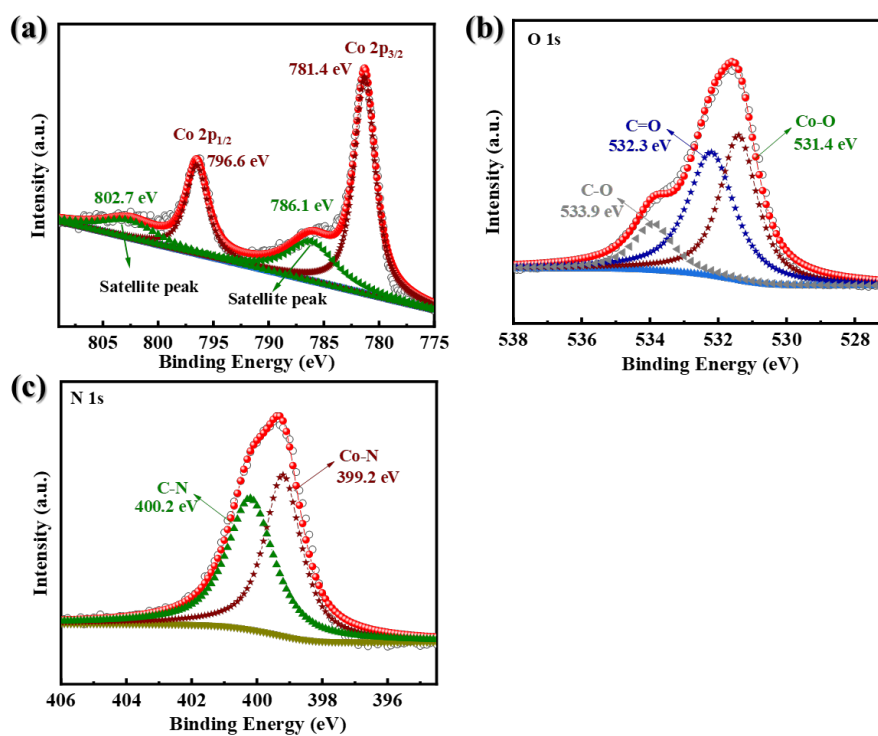

**Figure S31.** High-resolution XPS spectra of (a) Co 2p, (b) O 1s and (c) N 1s of CNTs/Co-N,O-CPs after durability test.

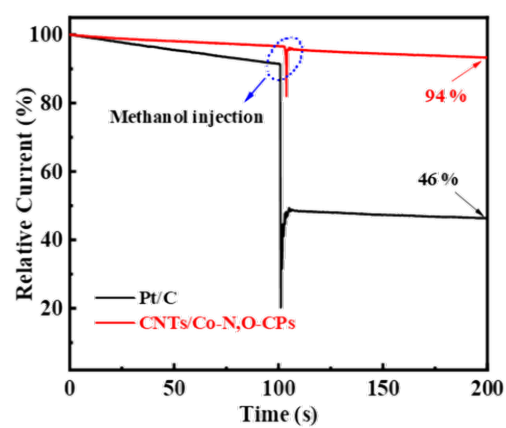

**Figure S32.** Chronoamperometric responses of CNTs/Co-N,O-CPs and Pt/C with the addition of methanol at approximately 100 s.



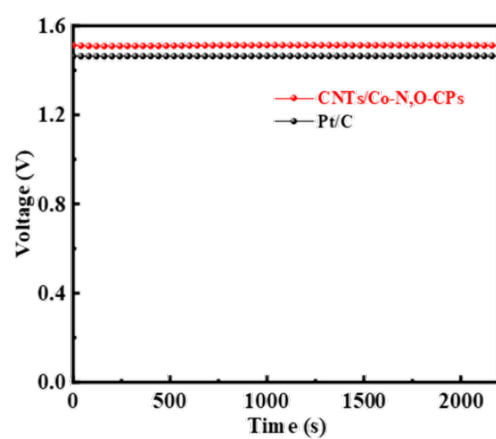

**Figure S33.** Open circuit potentials of CNTs/Co-N,O-CPs- and Pt/C-based Zn-air batteries.

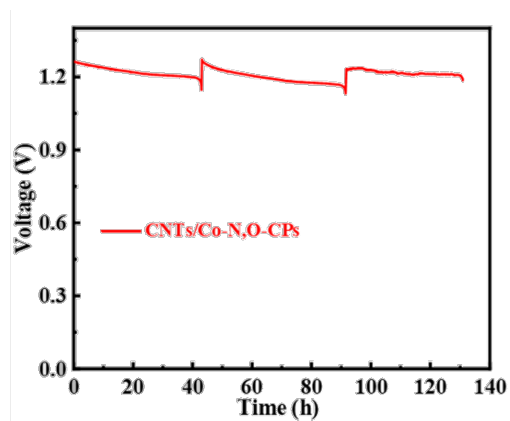

**Figure S34.** Long-term durability test of CNTs/Co-N,O-CPs-based zinc-air battery recharged by replacing the zinc anode and electrolyte.

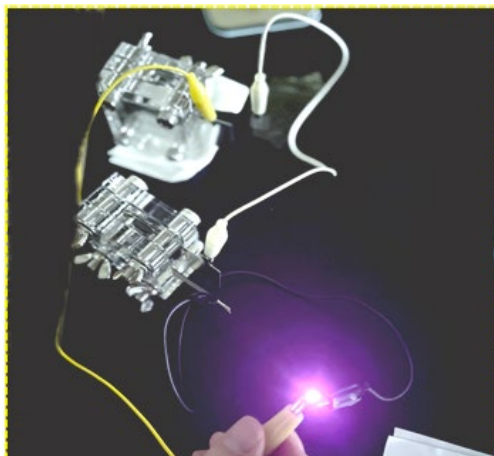

**Figure S35.** Photograph of a LED powered by two home-made zinc-air batteries with CNTs/Co-N,O-CPs as the air cathode.

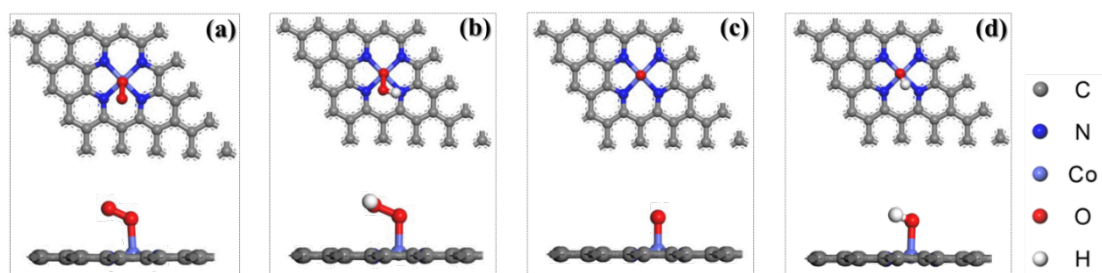

**Figure S36.** Optimized geometrical structures (top and side views) of (a)  $^*\text{OO}$ , (b)  $^*\text{OOH}$ , (c)  $^*\text{O}$ , and (d)  $^*\text{OH}$  adsorbed on Co-N<sub>4</sub>.

### 3. Tables

**Table S1.** Structural parameters extracted from EXAFS fitting of CNTs/Co-N,O-CPs.

| Sample          | Edge | Path | CN   | R(Å) | $\sigma^2(10^{-3} \text{ Å})$ | $\Delta E_0(\text{eV})$ | R-factor |
|-----------------|------|------|------|------|-------------------------------|-------------------------|----------|
| CNTs/Co-N,O-CPs | Co-K | Co-N | 2.36 | 1.94 | 1.12                          | -5.90                   | 0.015    |
|                 |      | Co-O | 2.26 | 2.09 | 1.08                          | 2.68                    |          |

CN: coordination number; R: interatomic distance;  $\sigma^2$ : Debye-Waller factor;  $\Delta E_0$ : inner potential correction; R-factor: goodness of the fitting.

**Table S2.** Comparison of various state-of-the-art electrocatalysts towards ORR and zinc-air batteries.

| Catalyst                          | Specific capacity<br>(mAh g <sup>-1</sup> ) | Power<br>density<br>(mW cm <sup>-2</sup> ) | Half-wave<br>potential<br>(E <sub>1/2</sub> V vs. RHE) | Diffusion-<br>limited current<br>density<br>(mA cm <sup>-2</sup> ) | Electron transfer<br>number (n) | Reference                                             |
|-----------------------------------|---------------------------------------------|--------------------------------------------|--------------------------------------------------------|--------------------------------------------------------------------|---------------------------------|-------------------------------------------------------|
| <b>CNTs/Co-N<sub>2</sub>O-CPs</b> | <b>814</b>                                  | <b>181</b>                                 | <b>0.868</b>                                           | <b>6.30</b>                                                        | <b>≈4</b>                       | <b>This Work</b>                                      |
| Co-NCS-2                          | 805                                         | 292                                        | 0.90                                                   | 5.0                                                                | 4                               | Nano Energy, 2021, <b>87</b> , 106153                 |
| Co-NCS-0                          | -                                           | -                                          | 0.81                                                   | 5.4                                                                | —                               |                                                       |
| Co SAs@PNCN                       | -                                           | 220                                        | 0.851                                                  | ≈5.9                                                               | 3.98                            | Small, 2022, <b>18</b> , 2202476                      |
| Co@NCNRs                          | -                                           | 76.76                                      | 0.835                                                  | 5.697                                                              | 4                               | Energy Environ. Mater., 2022, <b>0</b> , 1–7          |
| Co- CoN <sub>4</sub> @NCNs        | 776.7                                       | 118.8                                      | 0.83                                                   | 6.0                                                                | 3.8                             | Adv. Funct. Mater., 2022, <b>32</b> , 2207331         |
| CoNi-CoN <sub>4</sub> -HPC-900    | -                                           | 116                                        | 0.78                                                   | 6.85                                                               | 4                               | Nano Energy, 2022, <b>99</b> , 107325                 |
| FePc&rGO                          | 739.7                                       | 103                                        | 0.89                                                   | 5.4                                                                | 3.97                            | Energy Storage Mater., 2022, <b>50</b> , 12-20        |
| Fe-N-C                            | 775.7                                       | 175                                        | 0.895                                                  | 5.8                                                                | ≈4                              | Appl. Catal. B: Environ., 2022, <b>313</b> , 121454   |
| Co-CMS                            | 733.94                                      | 219                                        | 0.83                                                   | -                                                                  | 4                               | Adv. Energy Mater., 2022, <b>12</b> , 2103097         |
| Mn-RuO <sub>2</sub>               | 812                                         | 181                                        | 0.86                                                   | 6.0                                                                | -                               | J. Am. Chem. Soc., 2022, <b>144</b> , 2694–2704       |
| Ce-Co <sub>3</sub> O <sub>4</sub> | 876.3                                       | -                                          | 0.71                                                   | 4.83                                                               | 3.6                             | Adv. Funct. Mater., 2023, <b>33</b> , 2212021         |
| Mo/C                              | 771                                         | 197                                        | 0.810                                                  | 5.24                                                               | 4.0                             | J. Am. Chem. Soc., 2022, <b>144</b> , 20571–20581     |
| Ni-B/N-C                          | 700                                         | 175                                        | 0.87                                                   | 6.1                                                                | 3.94                            | Adv. Funct. Mater., 2023, 2213863                     |
| CNT@SAC-Co/NCP                    | 864.8                                       | 172                                        | 0.870                                                  | 5.4                                                                | 3.91                            | Adv. Funct. Mater., 2021, <b>31</b> , 2103360         |
| FeCo-NSC                          | 782.1                                       | 152.8                                      | 0.86                                                   | 5.26                                                               | 3.98                            | Energy Storage Mater., 2022, <b>45</b> , 805–813      |
| OLC/Co-N-C                        | 790                                         | 238                                        | 0.855                                                  | 5.5                                                                | 3.8                             | Angew. Chem. Int. Ed., 2021, <b>60</b> , 12759 –12764 |

**Table S3.** BET specific surface area and pore volume of CNTs/Co-N,O-CPs and CNTs/N,O-CPs.

| Sample          | BET specific surface area (m <sup>2</sup> g <sup>-1</sup> ) | Pore volume (cm <sup>3</sup> g <sup>-1</sup> ) |
|-----------------|-------------------------------------------------------------|------------------------------------------------|
| CNTs/Co-N,O-CPs | 197                                                         | 0.94                                           |
| CNTs/N,O-CPs    | 164                                                         | 0.72                                           |
| CNTs/Co-N-CPs   | 201                                                         | 1.03                                           |
| Co-N,O-CPs.     | 29                                                          | 0.15                                           |
